# Supplementary material for: Hostplant change and paleoclimatic events explain diversification shifts in skipper butterflies (Family: Hesperiidae)
Source: PubMed Central journal article supplement (PMC5541431; doi:10.1186/s12862-017-1016-x), 2017-08-02
Supplement: 12862_2017_1016_MOESM2_ESM.pdf [file 12862_2017_1016_MOESM2_ESM.pdf]

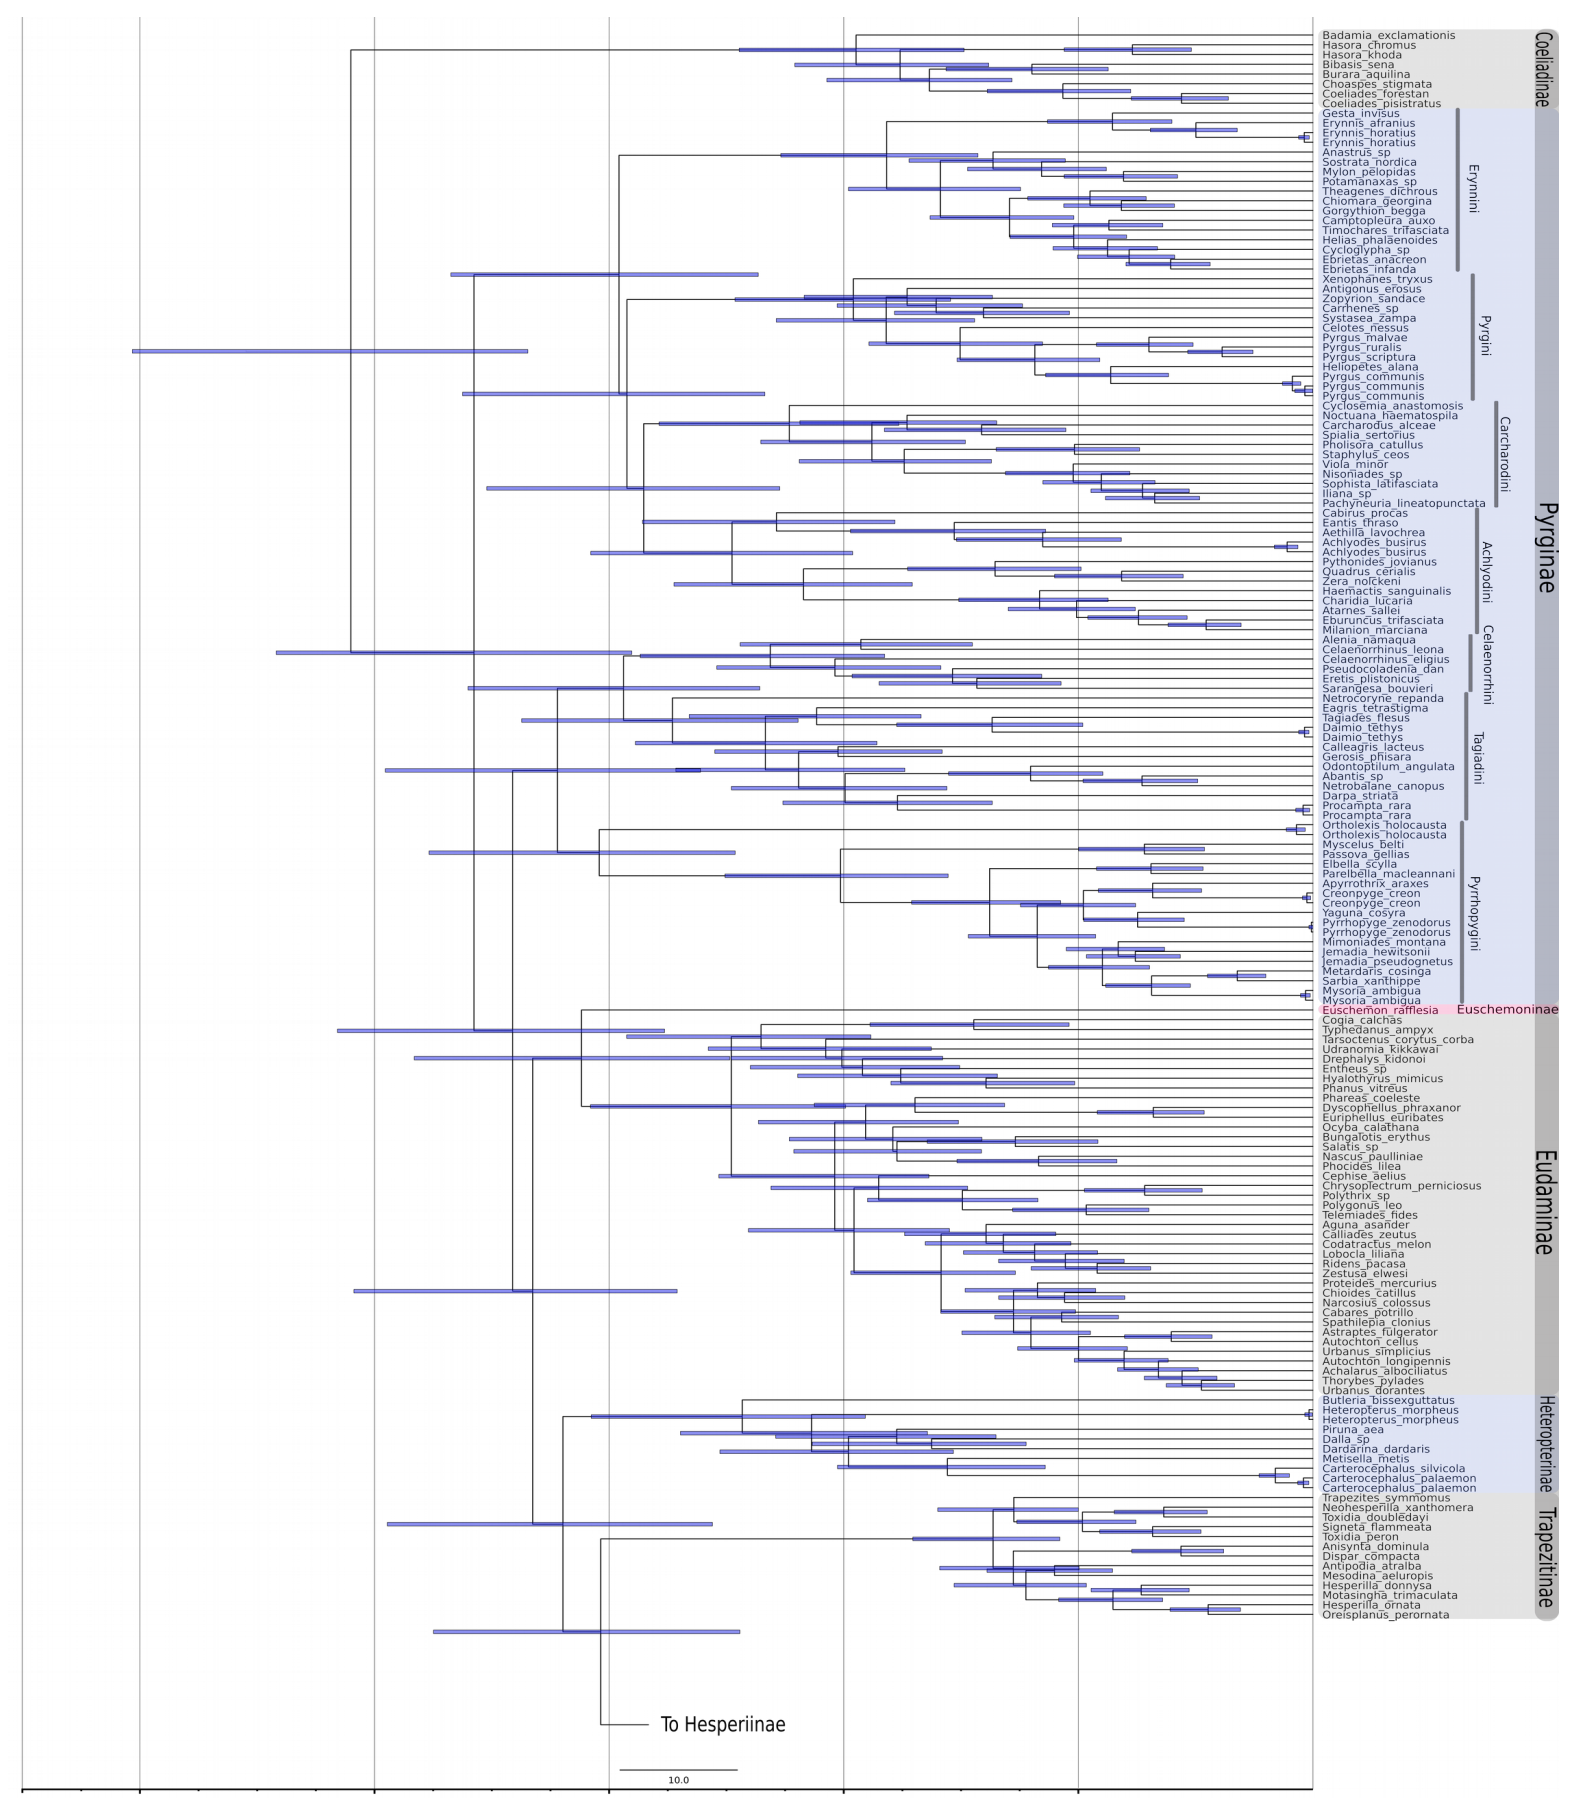

- Badamia exclamatoris
- Hasora chromus
- Hasora khoda
- Bibasis sena
- Burara aquilina
- Choaspes stigmata
- Coeliades forestan
- Coeliades piastriatus
- Gesta invisus
- Erynnis afranius
- Erynnis horatius
- Erynnis horatius
- Anostrus sp
- Sostrata nordica
- Mylon peliopidas
- Potamonaax sp
- Theagenes dichrous
- Chionara georgina
- Gorgythion begga
- Carniopteleura auxo
- Timocharis trifasciata
- Helias phalaenoides
- Cycloglypha sp
- Ebrietas anacreon
- Ebrietas mlanda
- Xenophanes tryxus
- Antigonus erosus
- Zopyrion sandace
- Carrhenes sp
- Systasea zampa
- Celotes nesus
- Pyrgus malvae
- Pyrgus ruralis
- Pyrgus scriptura
- Helioptetes alana
- Pyrgus communis
- Pyrgus communis
- Cyclosemia anastomosis
- Noctuana haematospila
- Carchardus alceae
- Spialia sertorius
- Poliora catullus
- Staphylus ceos
- Viola minor
- Nisoriades sp
- Sophista latifasciata
- Ilana sp
- Pachyneuria lineatopunctata
- Cabirus procas
- Eantis thraso
- Aethilia lavochrea
- Achyodes busirus
- Achyodes busirus
- Pythionides jovianus
- Quadrus cerialis
- Zera nolckeni
- Haemactis sanguinalis
- Charidia lucaria
- Atarnes salleri
- Eburuncus trifasciata
- Milanon marciana
- Alenia namaqua
- Celaenorrhinus leona
- Celaenorrhinus eligius
- Pseudocladena dan
- Eretis plistoncius
- Sarangesa bouvieri
- Netrocoryne repanda
- Eagris tetrastigma
- Tagiades hesus
- Daimio tethys
- Daimio tethys
- Callaegris lacteus
- Gerosis phisara
- Odontoptilum angulata
- Abantis sp
- Netrobalane canopus
- Darpa striata
- Procampta rara
- Procampta rara
- Ortholexis holocausta
- Ortholexis holocausta
- Mysectus belli
- Pessova gellias
- Elbella scylla
- Parellia macleannani
- Apyrothrix araxes
- Creonpyge creon
- Creonpyge creon
- Yaguna cosyra
- Pyrrhopyge zenodorus
- Mimoniades montana
- Jemadia hewitsoni
- Jemadia pseudognetus
- Metardaris cosinga
- Sarbia xanthippe
- Mysoria ambigua
- Mysoria ambigua
- Euschemon rafflesia** Euschemoninae
- Cogia calcha
- Typhedanus ampyx
- Iarsoctenus corytus corba
- Utraniomia kikawai
- Drephalus kidonoi
- Entheus sp
- Hyalothyrus mimicus
- Phanus vitreus
- Pharus celeste
- Dyscophellus phraxanor
- Euriphellus euribates
- Ocyba calathana
- Bungafotis erythus
- Salatis sp
- Nascus paullinae
- Phocides lilia
- Cephise aelius
- Chrysoplectrum perniciosus
- Polythrix sp
- Polygonus leo
- Telerhiades fides
- Aquila asander
- Calliades zeutus
- Codatractus melon
- Lobocia liliانا
- Ridens pacasa
- Zestus elwesi
- Proteides mercurius
- Chionides catillus
- Narcosius colossus
- Cabares potillo
- Spathilepis clonius
- Astraptus fulgurator
- Autochton cellus
- Urbanus simplicius
- Autochton longipennis
- Achalarus albociliatus
- Thorybes pylades
- Urbanus dorantes
- Butleria bissexguttatus
- Heteropterus morpheus
- Heteropterus morpheus
- Piruna aea
- Dalla sp
- Dardarina dardaris
- Metsella metis
- Carterocephalus silvicola
- Carterocephalus palaemon
- Trapezites symmionus
- Neohesperilla xanthomera
- Toxidia doubledayi
- Signeta flammeata
- Toxidia peron
- Anisynta dominula
- Dispar compacta
- Antipodia atralba
- Mesodina aeliuropis
- Hesperilla donnyssa
- Motasingha trimaculata
- Hesperilla ornata
- Oreispianus peromata

To Hesperinae

10.0

-110 -100 -80 -60 -40 -20

Coeliinae

Pyrginae

Eudaminae

Heteropterae  
Trapezitinae
